# Supplementary material
Source: Springer Nature journal article supplement (https://www.springermedizin.de/resource/supplementary/12916_2012_833_MOESM3_ESM.pdf/9598596)

**A**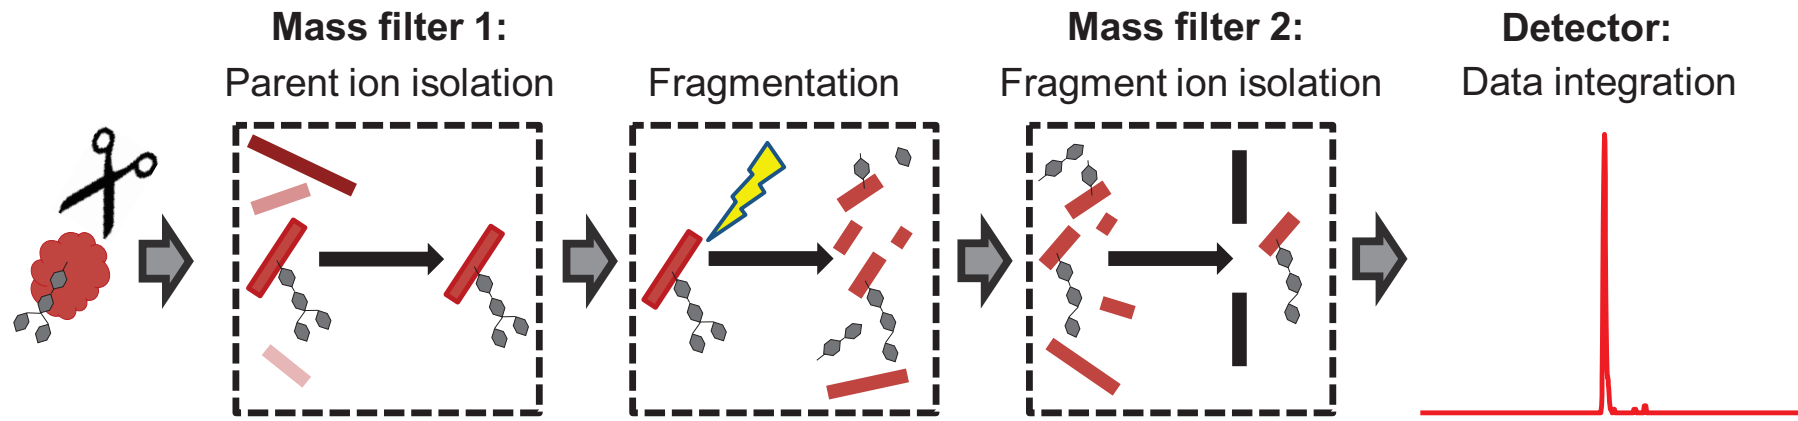**B**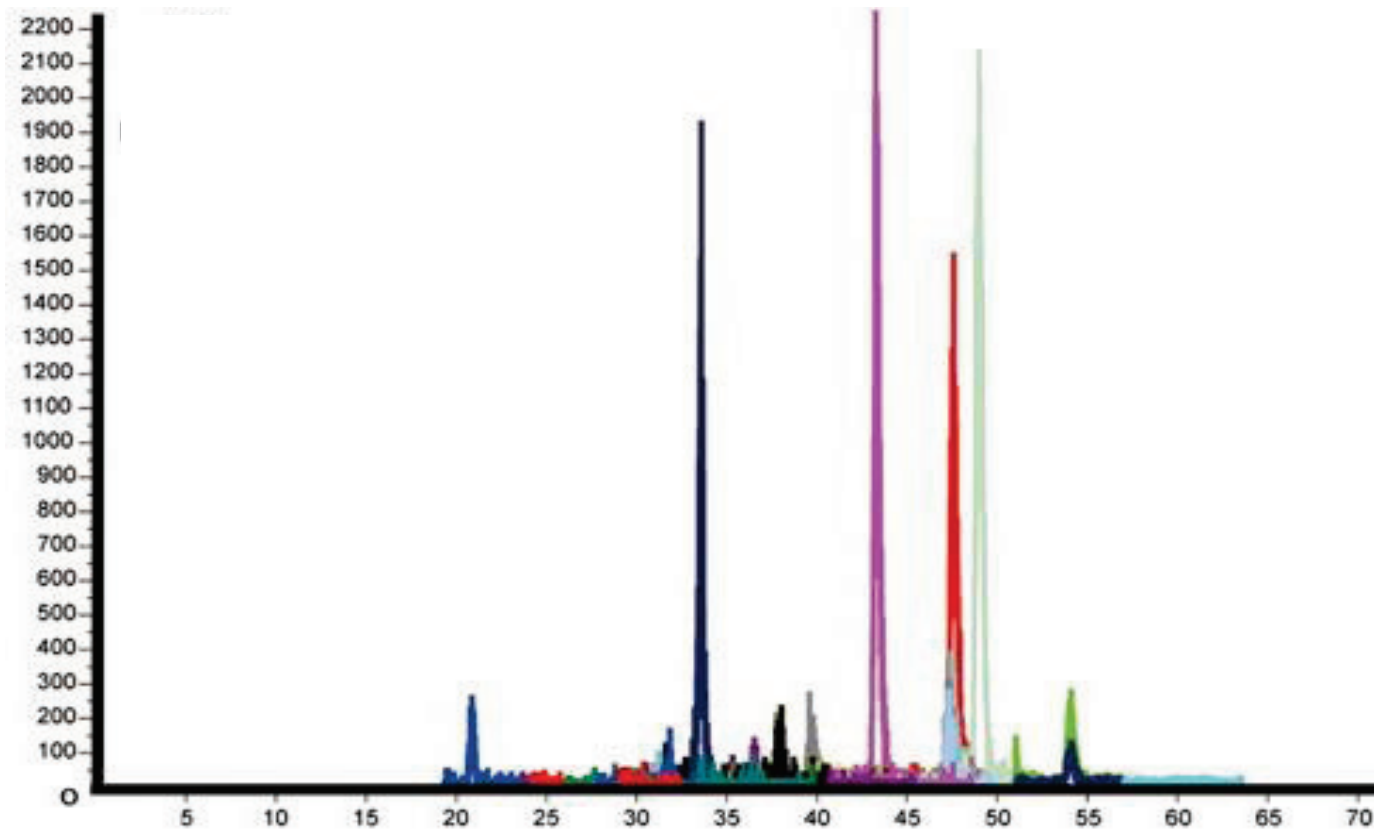

Supplement: MOESM3 [file 9598596]
